# Supplementary material
Source: PubMed Central journal article supplement (PMC10018800)

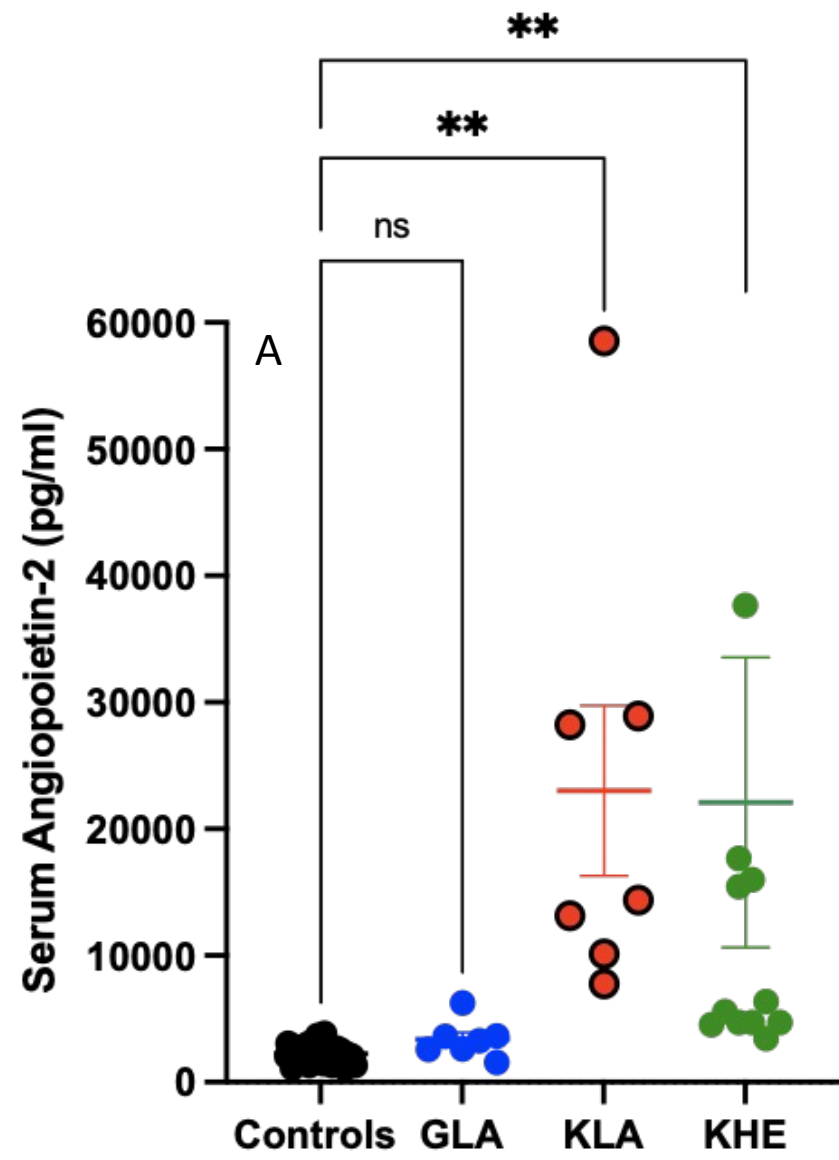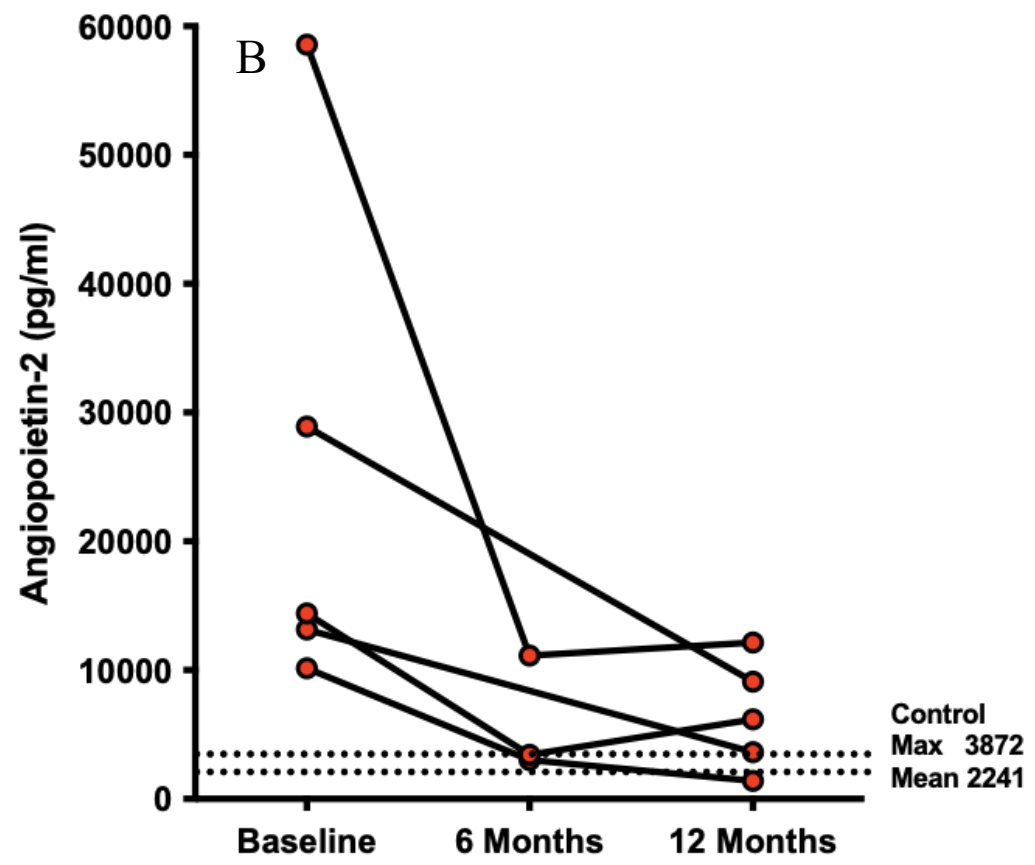

Supplement: NIHMS1864314-supplement-FigureS1.pdf [file NIHMS1864314-supplement-FigureS1.pdf]

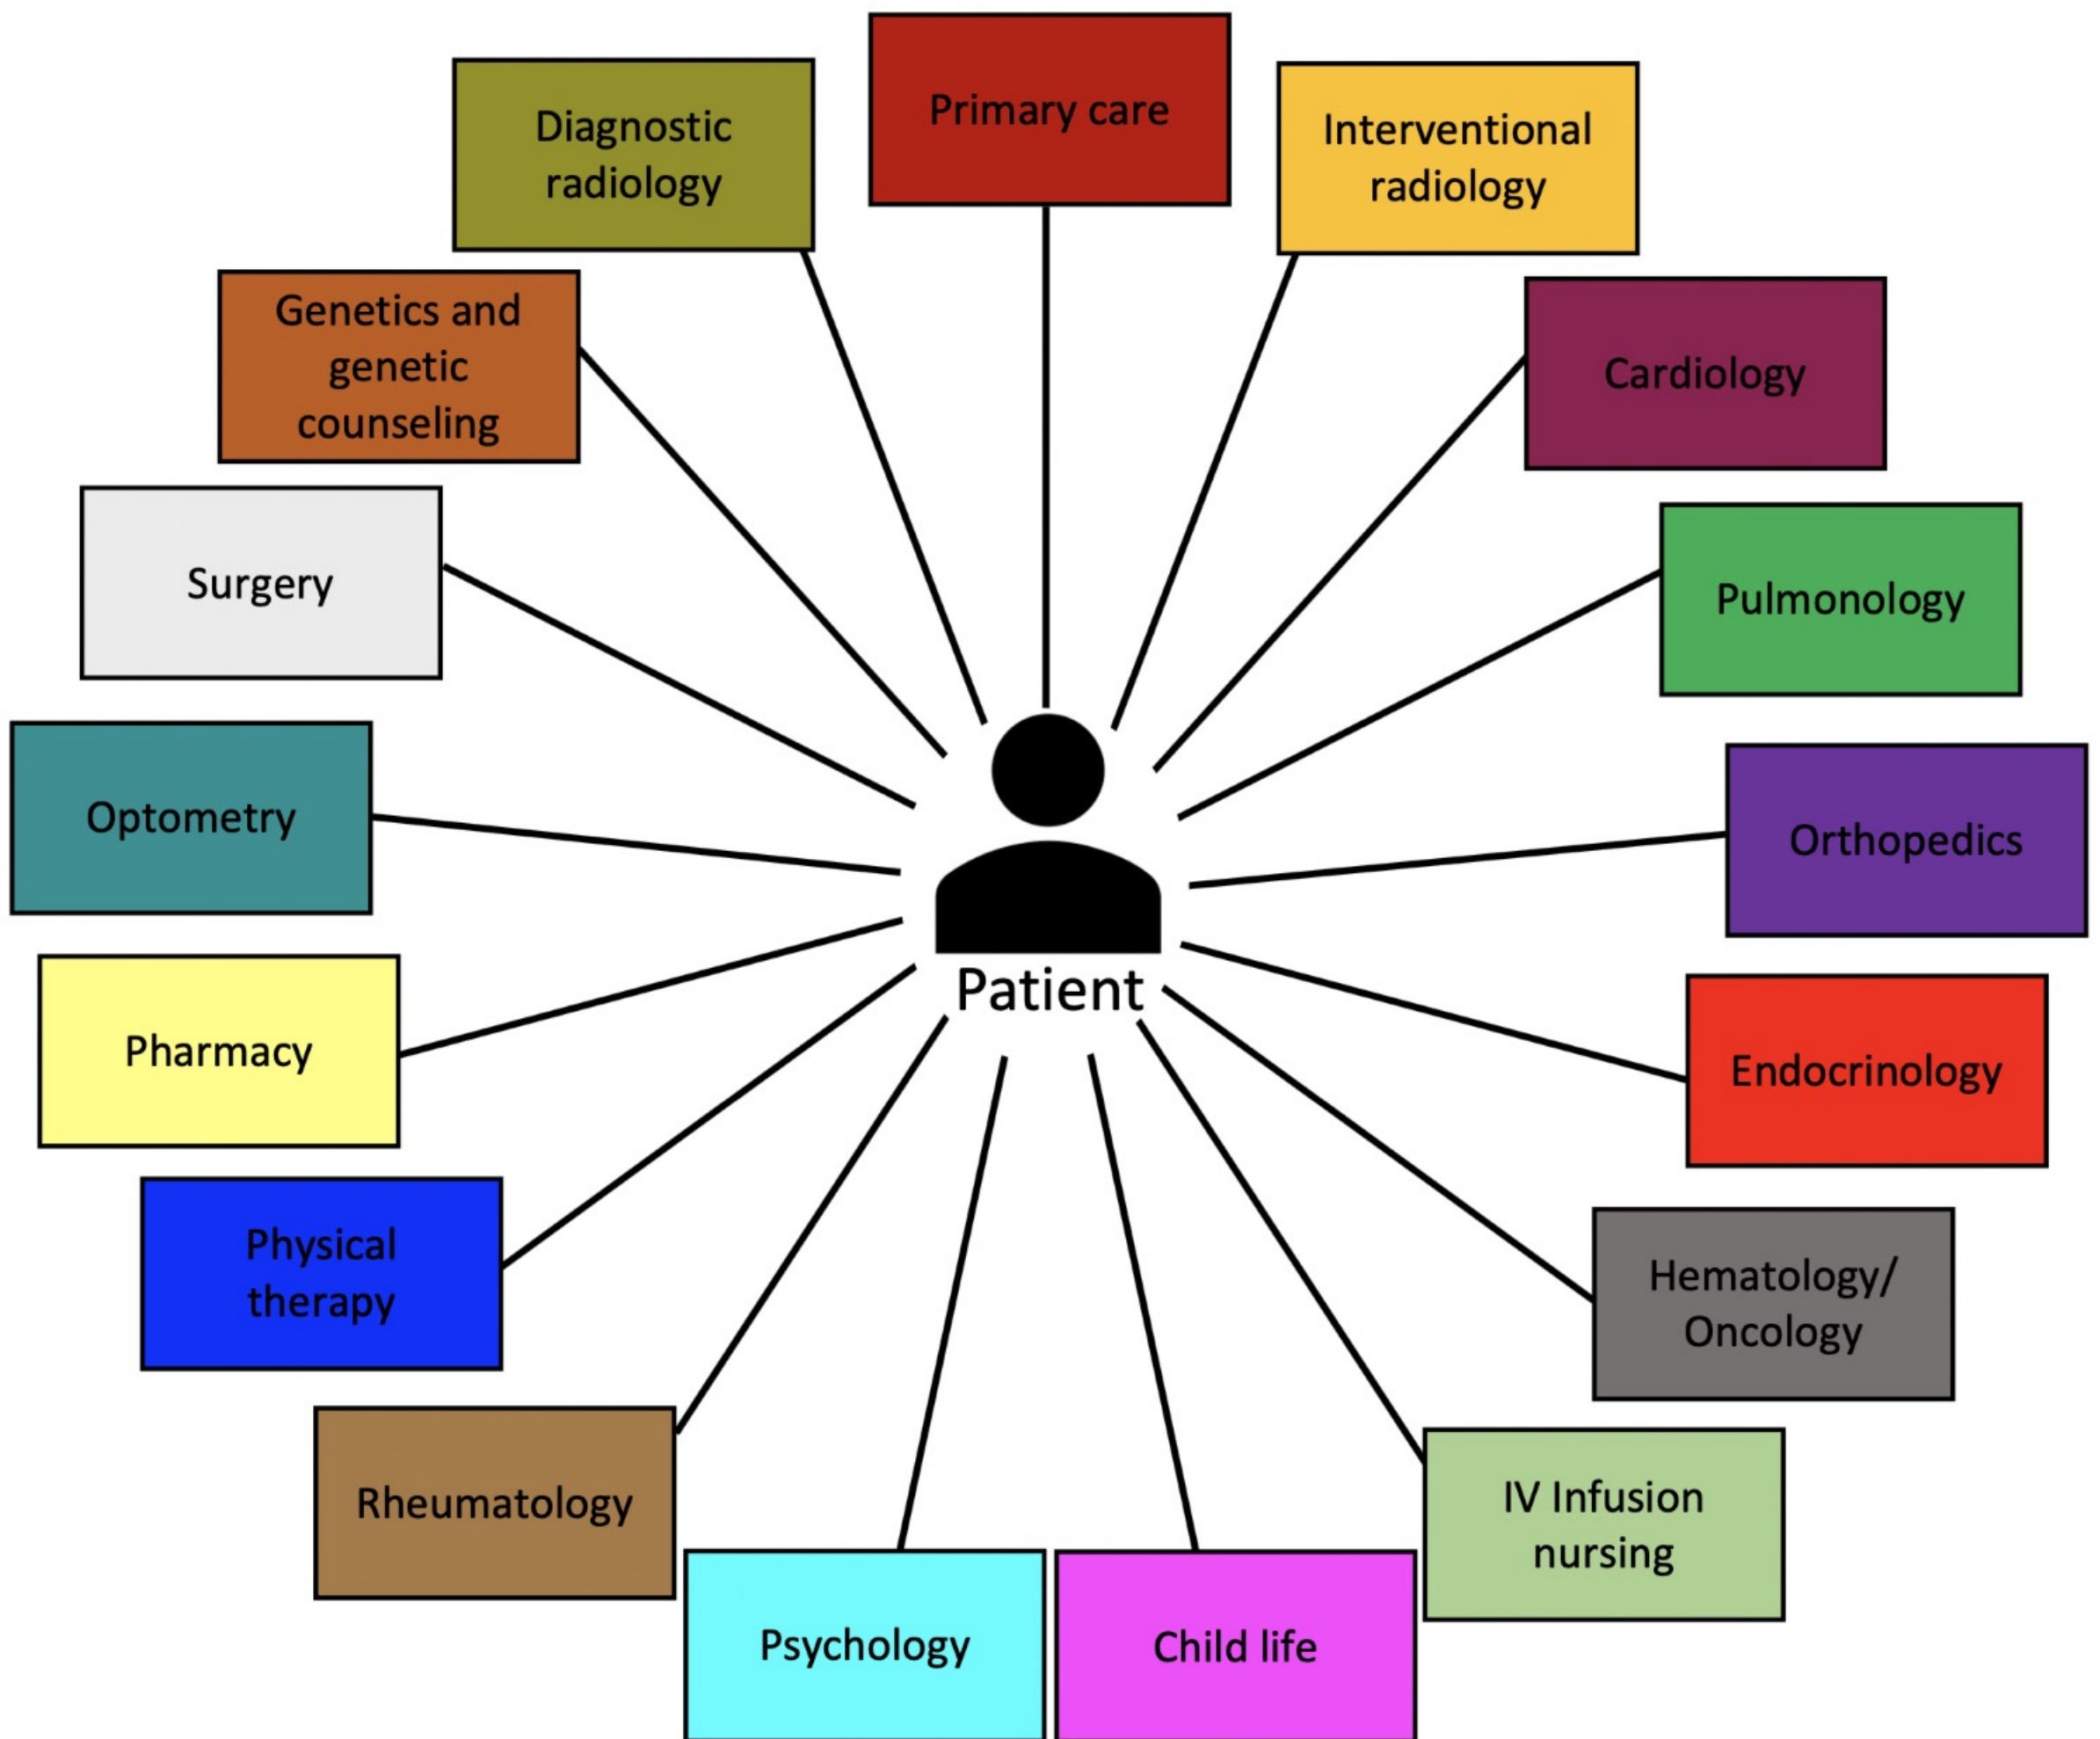

Supplement: NIHMS1864314-supplement-FigureS2.pdf [file NIHMS1864314-supplement-FigureS2.pdf]
